# Supplementary material
Source: publisher site journal article supplement (https://www.degruyterbrill.com/publication/journal_key/LITY/downloadAsset/LITY_Language%20Profiles.pdf)
Supplement: Supplementary file 1 [file LITY_Language%20Profiles.pdf]

## Linguistic Typology

### Language Profiles, Family Portraits, and Areal surveys

'Language / Family / Area Portraits' should give a profile of the language(s) in typological perspective, with particular attention to the points of greatest typological interest. Examples of previous profiles can be seen here:

- Quesada, J. Diego. 1999. Chibchan, with special reference to participant-highlighting. *Linguistic Typology* 3(2). 209–257.
- Evans, Nicholas. 2000. Iwaidjan, a very un-Australian language family. *Linguistic Typology* 4(1). 91–142.
- François, Alex. 2005. A typological overview of Mwotlap, an Oceanic language of Vanuatu. *Linguistic Typology* 9(1). 115–146.
- Epps, Patience. 2008. Hup's typological treasures: Description and explanation in the study of an Amazonian language. *Linguistic Typology* 12(2). 169–193.
- Yager, Joanne & Niclas Burenhult. 2017. Jedek: A newly discovered Aslian variety of Malaysia. *Linguistic Typology* 21(3). 493–545.

We invite prospective authors to use their own creativity in bringing out what is most interesting and unusual in the languages or families they are describing.
